# Supplementary material
Source: PubMed Central journal article supplement (PMC2268138)

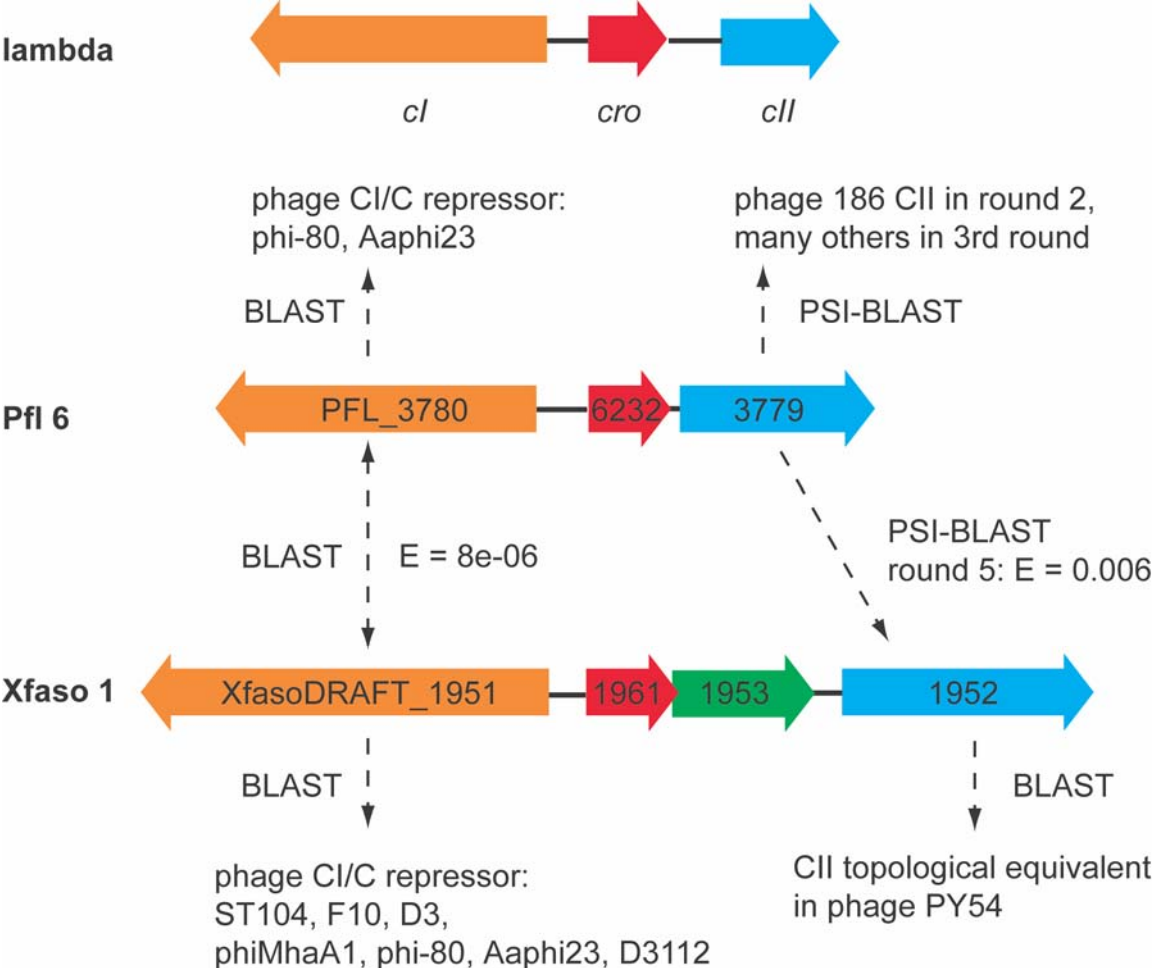

Supplement: supp_0711589105_11589Fig5.pdf [file supp_0711589105_11589Fig5.pdf]

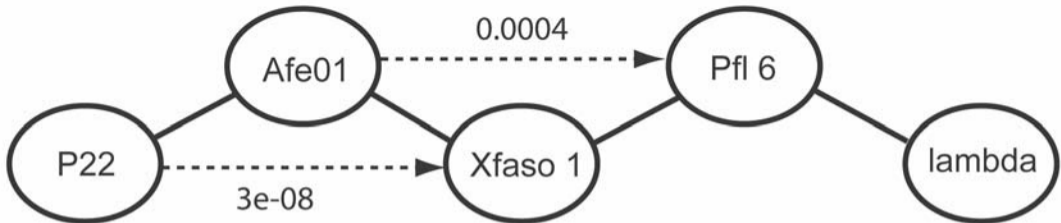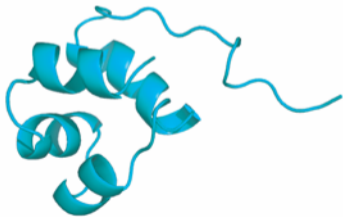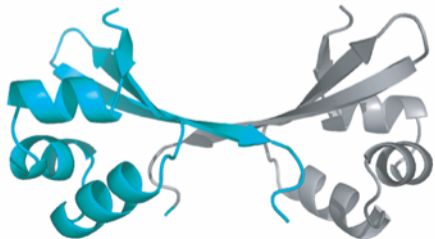

Supplement: supp_0711589105_11589Fig6.pdf [file supp_0711589105_11589Fig6.pdf]
